# Supplementary material
Source: publisher figshare collection journal article supplement (https://karger.figshare.com/articles/dataset/_/3840738)
Supplement: Supplementary file 1 [file 1]

**Isolated cystic periventricular leukomalacia is different from cystic periventricular leukomalacia with intraventricular hemorrhage in prevalence, risk factors and outcomes in preterm infants**

Lan-Wan Wang, Yung-Chieh Lin, Yi-Fang Tu, Shan-Tair Wang, Chao-Ching Huang, for the Taiwan Premature Infant Developmental Collaborative Study Group

**Page 2: Supplementary Table 1**

**Page 3: Supplementary Table 2**

**Supplementary Table 1. Effects of demographic and medical factors on the risk of isolated cPVL, cPVL with low-grade (I/II) IVH, and cPVL with high-grade (III) IVH in very preterm infants**

|  | **Odds of cPVL** | | |
| --- | --- | --- | --- |
| **Isolated** | **With I/II IVH** | **With III IVH** |
| **Demographic Factors**  GA < 27 weeks  OR (95% CI)  adjusted OR (95% CI)  Birth weight < 1000 g  OR (95% CI)  adjusted OR (95% CI)  **Perinatal Period**  Preeclampsia  OR (95% CI)  adjusted OR (95% CI)  5-min Apgar score < 5  OR (95% CI)  adjusted OR (95% CI)  **Neonatal Period**  Severe RDS  OR (95% CI)  adjusted OR (95% CI)  PDA ligation  OR (95% CI)  adjusted OR (95% CI)  Pulmonary hemorrhage  OR (95% CI)  adjusted OR (95% CI)  Pneumothorax  OR (95% CI)  adjusted OR (95% CI)  Shock  OR (95% CI)  adjusted OR (95% CI)  Prolonged MV  OR (95% CI)  adjusted OR (95% CI)  Sepsis  OR (95% CI)  adjusted OR (95% CI) | 0.99 (0.61-1.63)  0.83 (0.45-1.62)  0.88 (0.58-2.70)  1.17 (0.60-2.28)  0.94 (0.54-1.64)  1.21 (0.62-2.36)  1.83 (0.99-3.39)  1.48 (0.86-2.33)    1.33 (0.90-1.96)  1.35 (0.84-2.13)  1.40 (0.79-2.49)  1.08 (0.52-2.27)  0.80 (0.29-2.18)  0.40 (0.09-1.71)  0.90 (0.22-3.70)  0.68 (0.31-1.48)  1.77 (0.81-3.88)  1.28 (0.59-2.79)  1.10 (0.71-1.71)  0.68 (0.36-1.28)  **1.87 (1.27-2.75)**b  **2.35 (1.49-3.73)**c | **2.73 (1.97-3.79)**c  1.64 (0.89-3.02)  **1.98 (1.45-2.70)**c  0.88 (0.48-1.61)  **0.50 (0.27-0.91)**a  0.69 (0.34-1.41)  **3.57 (2.36-5.41)**c  **2.42 (1.38-4.26)**b  **2.54 (1.82-3.55)**c  **1.64 (1.02-2.65)**a  1.68 (1.08-2.60)a  0.66 (0.37-1.19)  1.53 (0.81-2.87)  0.75 (0.33-1.72)  **2.92 (1.43-5.99)**b  1.88 (0.81-4.41)  1.52 (0.76-3.05)  1.56 (0.89-3.65)  **3.86 (2.82-5.26)**c  **2.27 (1.39-3.69)**b  **1.61 (1.15-2.24)**b  1.20 (0.78-1.83) | **6.37 (4.37*-*9.26)**c  **3.30 (1.68-6.50)**b  **3.77 (2.58-5.52)**c  0.58 (0.27-1.24)  0.54 (0.27-1.08)  0.96 (0.37-2.45)  **4.22 (2.63-6.76)**c  **2.56 (1.36-4.83)**b  **5.59 (3.51-8.93)c**  **2.56 (1.42-4.61)**b  **2.79 (1.77-4.37)**c  0.85 (0.47-1.54)  **3.53 (2.04-6.13)**c  1.21 (0.57-2.57)  **4.22 (2.05-8.70)**c  **2.61 (1.16-5.88)**a  **4.67 (2.72-8.06)**b  **2.87 (1.43-5.75)**b  **7.04 (4.74-10.4)**c  **3.65 (1.98-6.76)**c  **1.87 (1.27-2.75)**b  1.24 (0.76-2.05) |

The reference group was infants without cPVL and IVH, and the odds ratio (OR) was adjusted for all the confounding variables in the multi-nominal logistic regression model. cPVL, cystic periventricular leukomalacia; IVH, intraventricular hemorrhage; CI, confidence interval; GA, gestational age; RDS, respiratory distress syndrome; PDA, patent ductus arteriosus; MV, mechanical ventilation. a*P* < 0.05; b*P* < 0.01; c*P* < 0.001.

**Supplementary Table 2.** Comparison between the infants retained and those lost to follow-up at corrected age 24 months

|  | **Retained infants**  **N = 6437** | **Lost infants**  **N = 853** |
| --- | --- | --- |
| Gestational age (week) | 28.3 (2.0) | 28.5 (1.9) |
| Birth weight (g) | 1123.5 (234.5) | 1131.6 (233.6) |
| Male | 3231 (50.2) | 423 (49.6) |
| Vaginal delivery | 2562 (39.8) | 350 (41.0) |
| Preeclampsia | 1043 (16.2) | 157 (18.4) |
| Antepartum hemorrhage | 1686 (26.2) | 220 (25.8) |
| Clinical chorioamnionitis | 1384 (21.5) | 198 (23.2) |
| 5-min Apgar score < 5 | 702 (10.9) | 84 (9.8) |
| Severe respiratory distress syndrome | 3077 (47.8) | 417 (48.9) |
| Patent ductus arteriosus ligation | 586 (9.1) | 72 (8.4) |
| Pneumothorax | 206 (3.2) | 32 (3.8) |
| Shock | 251 (3.9) | 31 (3.6) |
| Prolonged mechanical ventilation | 1532 (23.8) | 193 (22.6) |
| Sepsis | 1834 (28.5) | 236 (27.7) |
| Necrotizing enterocolitis > stage II | 232 (3.6) | 33 (3.9) |
| Cystic periventricular leukomalacia | 260 (4.0) | 24 (2.8) |
| Intraventricular hemorrhage  grade I/II  grade III | 2318 (36.0)  230 (3.6) | 311 (36.5)  26 (3.0) |

Data are presented as mean (standard deviation) or n (%). Group differences were tested by chi-square analysis with categorical variables and t test with numerical variables.
